# Supplementary material for: Factors Associated with Intentional Non-adherence to Endocrine Treatment Among Early Breast Cancer Survivors: A Multicenter Cross-Sectional Study
Source: Research Square preprint supplement (doi:10.21203/rs.3.rs-6048223/v1), 2025-02-25
Supplement: Supplementary file 1 [file bba4825fb780fcd16e9c5f54.docx]

**Supplementary Information**

**Journal of Cancer Survivorship**

**Date of submission : February 17, 2025**

**Article title:** Factors Associated with Intentional Non-adherence to Endocrine Treatment Among Early Breast Cancer Survivors: A Multicenter Cross-Sectional Study

**Authors:** Ana Dugonjić Okroša, Tajana Silovski, Natalija Dedić Plavetić, Domagoj Kifer, Anuška Budisavljević, Hrvoje Silovski, Ana Šešelja Perišin, Renata Kelemenić Dražin, Marko Skelin, Lana Jajac Bručić, Josipa Jović Zlatović, Iva Mucalo

**Affiliations:**

a Centre for Applied Pharmacy, Faculty of Pharmacy and Biochemistry, University of Zagreb, Ante Kovačića 1, 10000 Zagreb, Croatia
b Department of Oncology, University Hospital Centre Zagreb, Kišpatićeva 12, 10000 Zagreb, Croatia
c School of Medicine, University of Zagreb, Šalata 3, 10000 Zagreb, Croatia
d Department of Medical Oncology and Hematology, General Hospital Pula, Zagrebačka 30, 52100 Pula, Croatia
e Department of Surgery, University Hospital Centre Zagreb, Kišpatićeva 12, 10000 Zagreb, Croatia
f Department of Pharmacy, School of Medicine, University of Split, Šoltanska 2, 21000 Split, Croatia

g Department of Hematology, Oncology and Clinical Immunology, General Hospital Varaždin, Ivana Meštrovića 1, 42000 Varaždin, Croatia
h Pharmacy Department, General Hospital of Šibenik-Knin County, Stjepana Radića 83, 22000 Šibenik, Croatia

i Faculty of Medicine, University of Rijeka, Braće Branchetta 20, 51000 Rijeka, Croatia

j Department of Internal Medicine, General Hospital of Šibenik-Knin County, Stjepana Radića 83, 22000, Šibenik, Croatia.

**Corresponding author:**

Iva Mucalo, [imucalo@pharma.hr](mailto:imucalo@pharma.hr)

This Supplementary Information provides details on additional survey questions used in this study

Survey questions

1. How many doses of your currently prescribed endocrine medication have you missed in the last month (the last 30 days)?

2. How long has your physician recommended that you take endocrine therapy?

3. Are you taking your medication throughout the entire recommended treatment period?

□ Yes

□ No (please specify how long your therapy break was) _______________

□ I am not taking the medication at all

4. Have you thought about discontinuing the therapy?

□ No

□ Yes (please state the reasons for discontinuing the therapy) _______________
